# Supplementary material
Source: MDPI journal article supplement (https://www.mdpi.com/2673-8023/1/1/10)
Supplement: s1 [file s1]

# Strain-Dependent Adsorption of *Pseudomonas aeruginosa*-Derived Adhesin-like Peptides at Abiotic Surfaces

Yu Yang, Sabrina Schwiderek, Guido Grundmeier and Adrian Keller \*

Technical and Macromolecular Chemistry, Paderborn University, Warburger Str. 100,  
33098 Paderborn, Germany

\* Correspondence: adrian.keller@uni-paderborn.de, Tel.: +49-5251-60-5722

## XPS characterization of the oxide surfaces

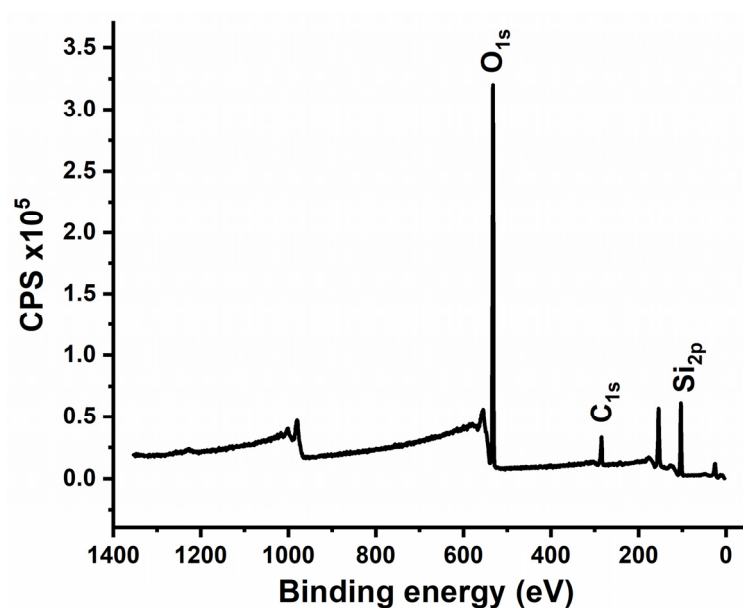

Figure S1. Ex-situ XPS survey of the SiO<sub>2</sub> film.

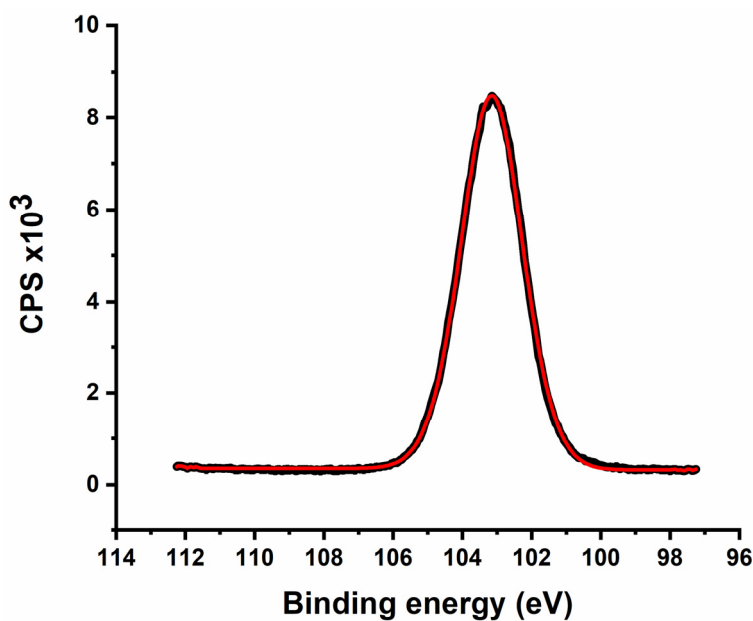

Figure S2. Ex-situ XPS Si<sub>2p</sub> high-resolution spectrum of the SiO<sub>2</sub> film.

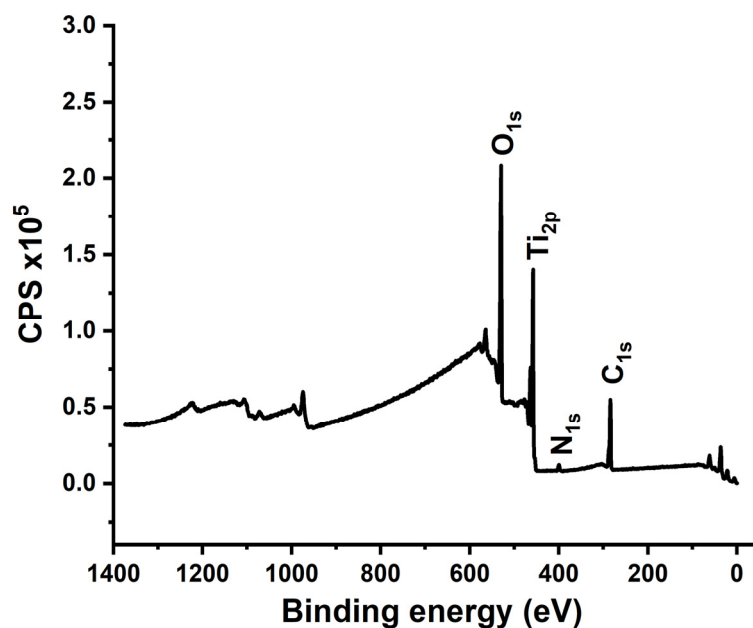

**Figure S3.** Ex-situ XPS survey of the TiO<sub>x</sub>/Ti film.

**Table S1.** XPS quantification results for the SiO<sub>2</sub> and TiO<sub>x</sub>/Ti films.

| Sample               | C1s / at. % | O1s / at. % | Si2p / at. % | Ti2p / at. % |
|----------------------|-------------|-------------|--------------|--------------|
| SiO <sub>2</sub>     | 10.8 ± 0.8  | 52.6 ± 0.3  | 36.6 ± 0.5   | -            |
| TiO <sub>x</sub> /Ti | 40.7 ± 1.1  | 42.8 ± 0.3  | -            | 16.5 ± 0.8   |

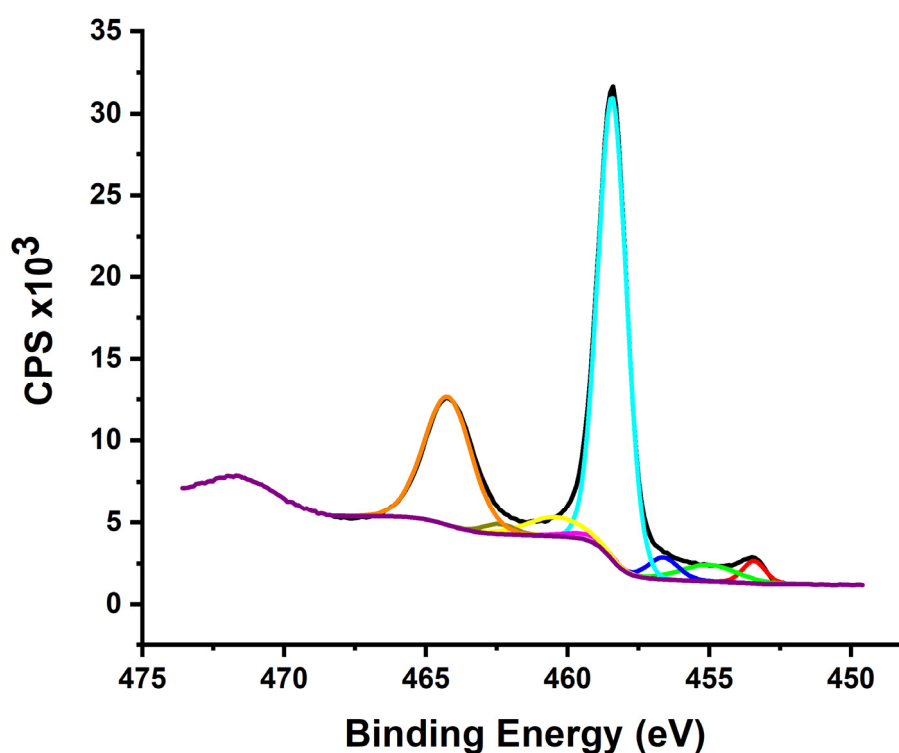

**Figure S4.** Ex-situ XPS Ti2p high-resolution spectrum of the TiO<sub>x</sub>/Ti film.

**Table S2.** Results of the Ti 2p deconvolution.

| Ti 0+     | Ti 2+     | Ti 3+     | Ti 4+      |
|-----------|-----------|-----------|------------|
| 2.2 ± 1.6 | 6.7 ± 1.7 | 4.7 ± 0.4 | 86.3 ± 3.0 |

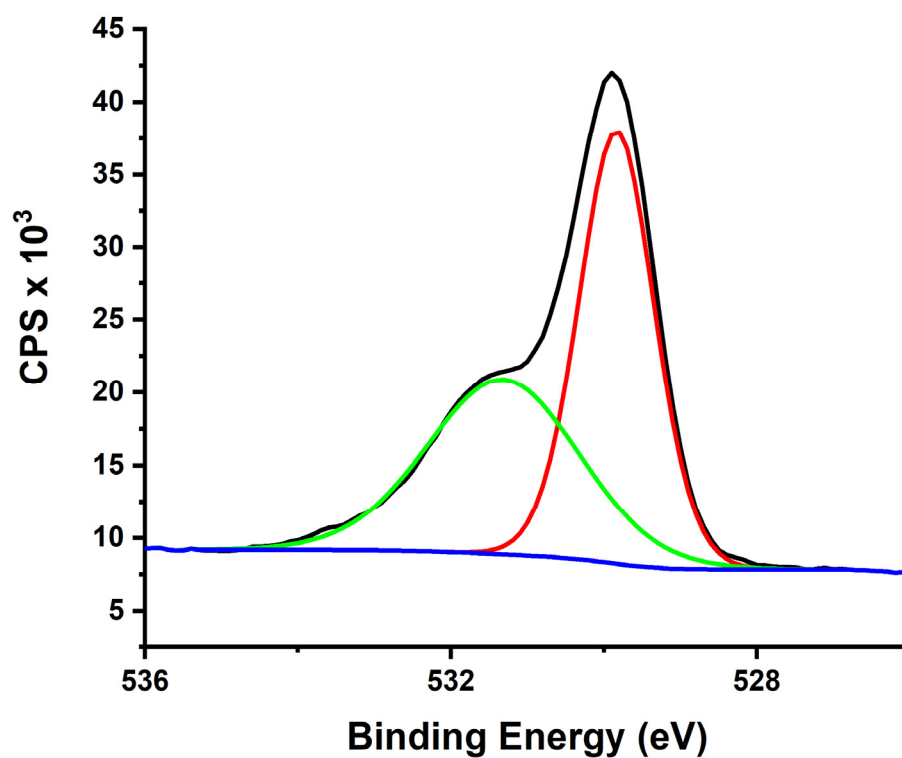

Figure S5. Ex-situ XPS O1s high-resolution spectrum of the TiO<sub>x</sub>/Ti film.

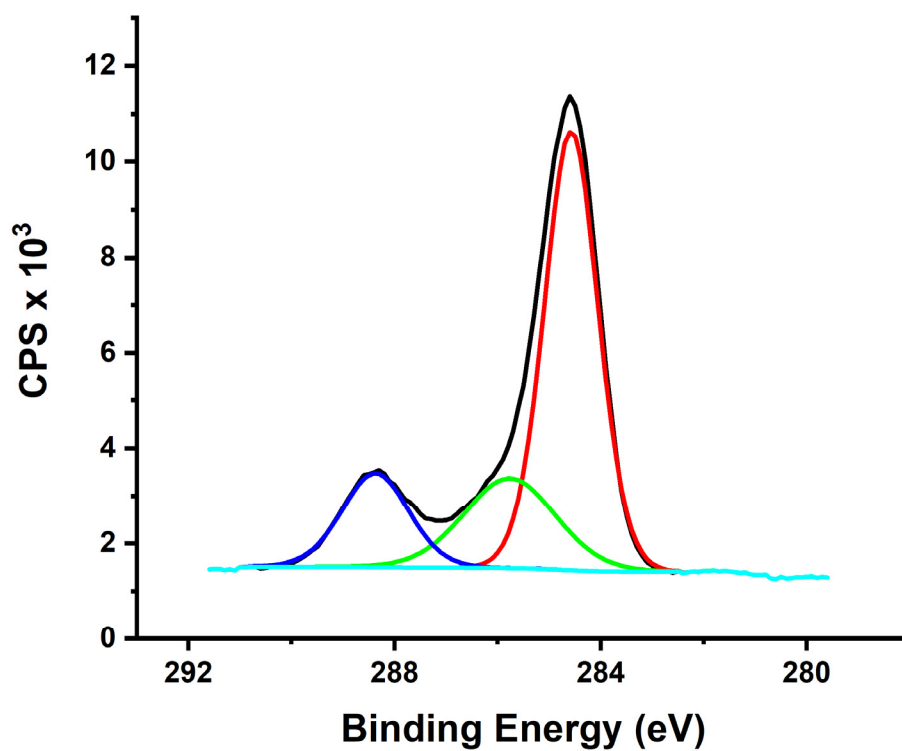

Figure S6. Ex-situ XPS C1s high-resolution spectrum of the TiO<sub>x</sub>/Ti film.

## QCM-D measurements: overtones 3 to 9

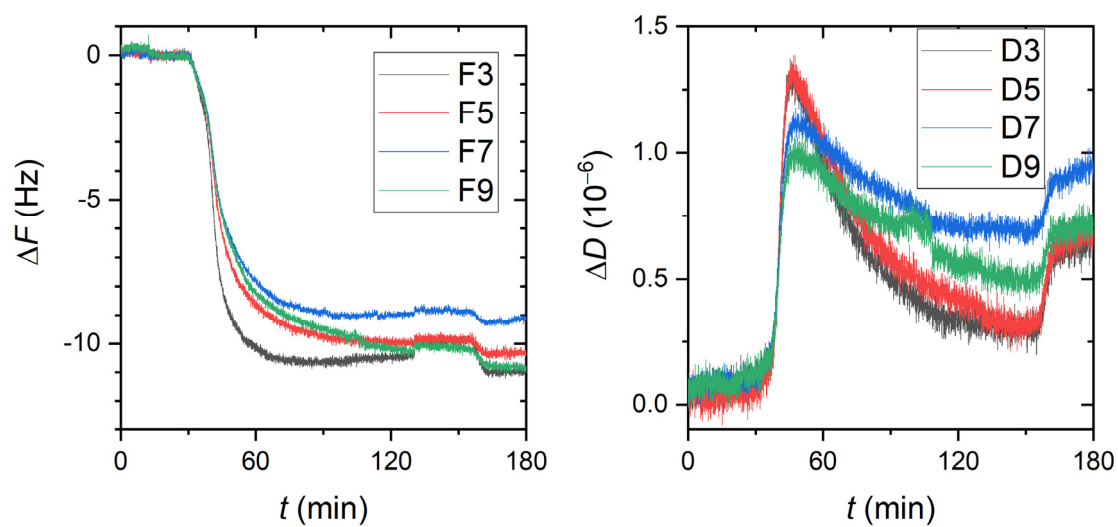

Figure S7. QCM-D results (overtones 3 to 9) for PAK(128-144) adsorption at the Au surface.

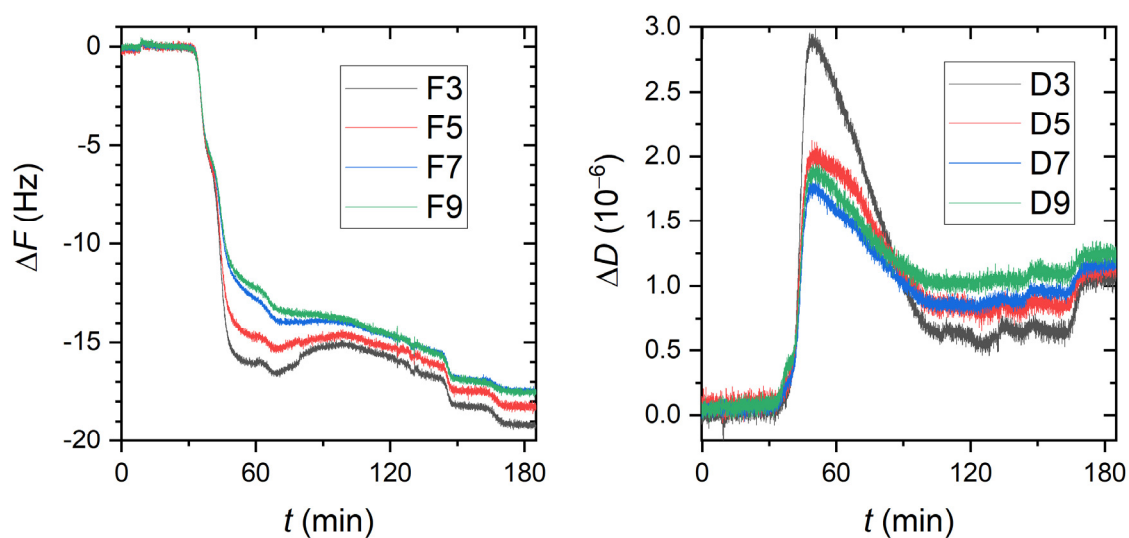

Figure S8. QCM-D results (overtones 3 to 9) for PAO(128-144) adsorption at the Au surface.

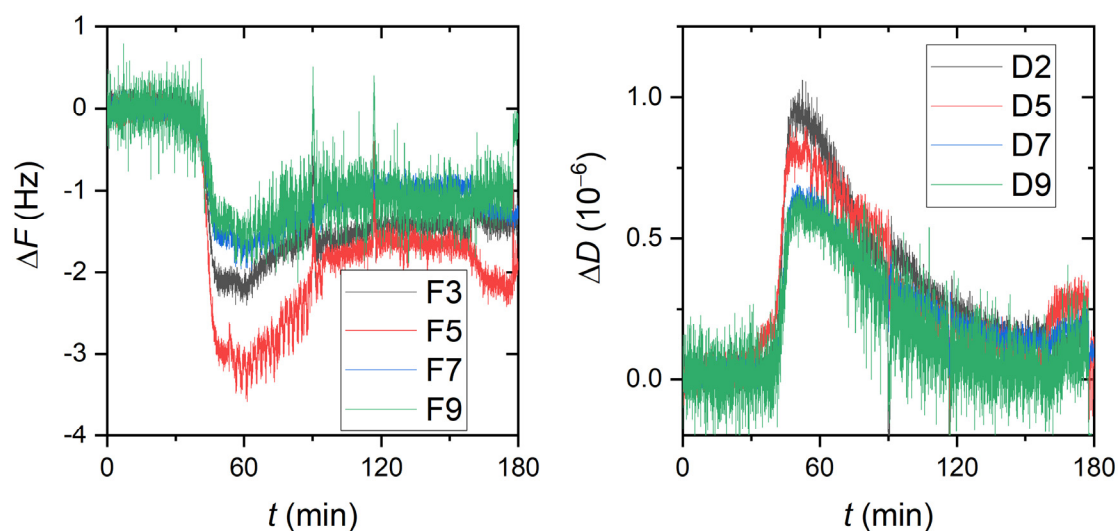

Figure S9. QCM-D results (overtones 3 to 9) for PAK(128-144) adsorption at the SiO<sub>2</sub> surface.

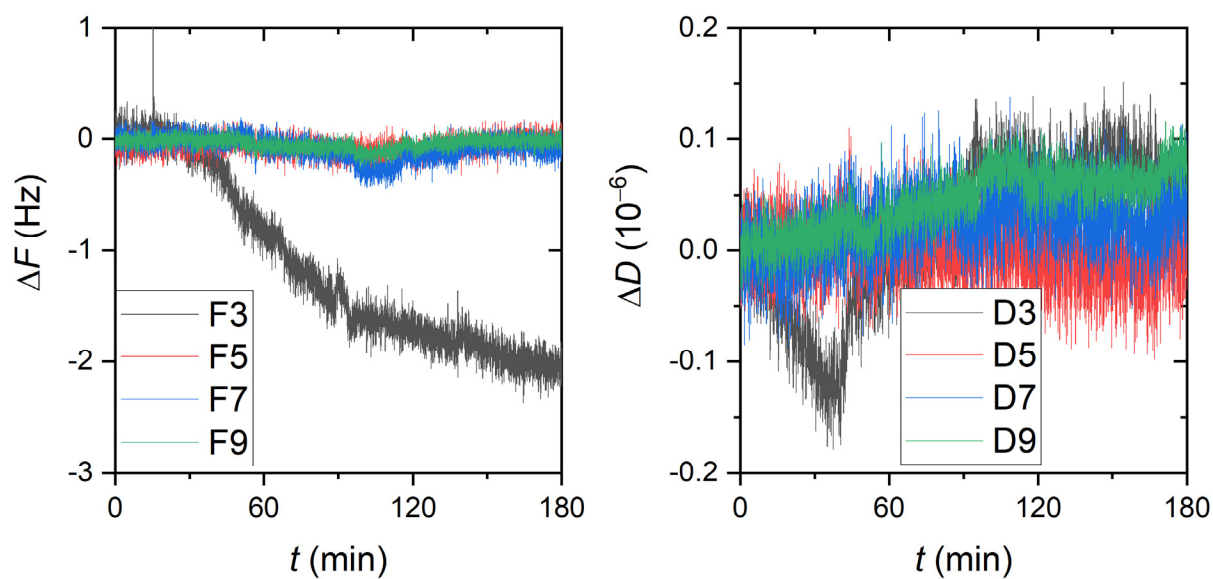

**Figure S10.** QCM-D results (overtones 3 to 9) for PAO(128-144) adsorption at the SiO<sub>2</sub> surface.

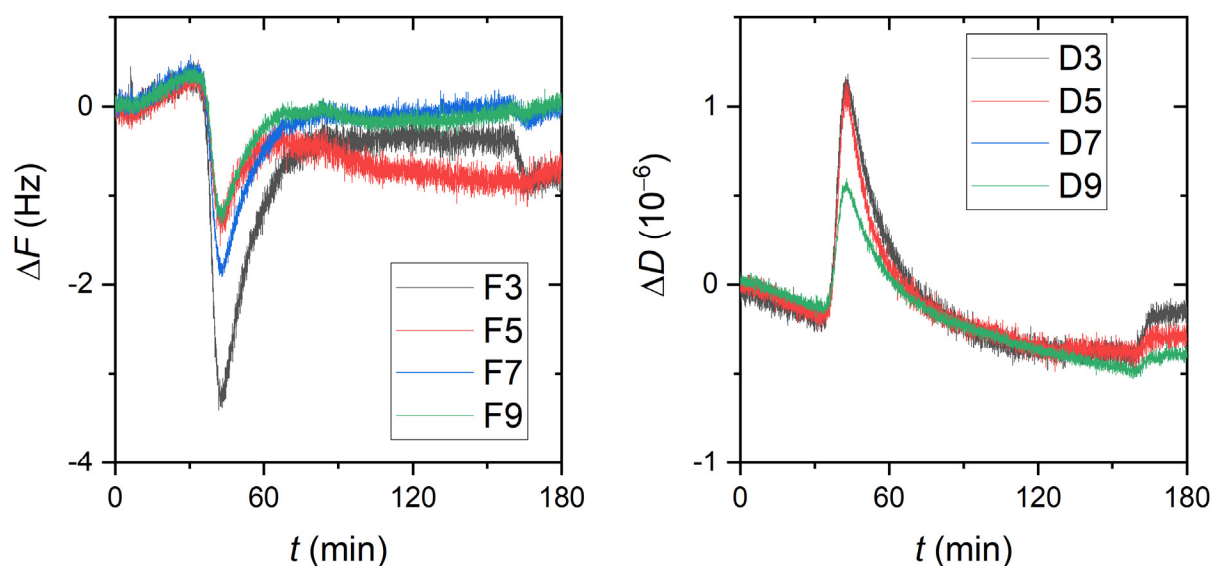

**Figure S11.** QCM-D results (overtones 3 to 9) for PAK(128-144) adsorption at the TiO<sub>x</sub>/Ti surface.

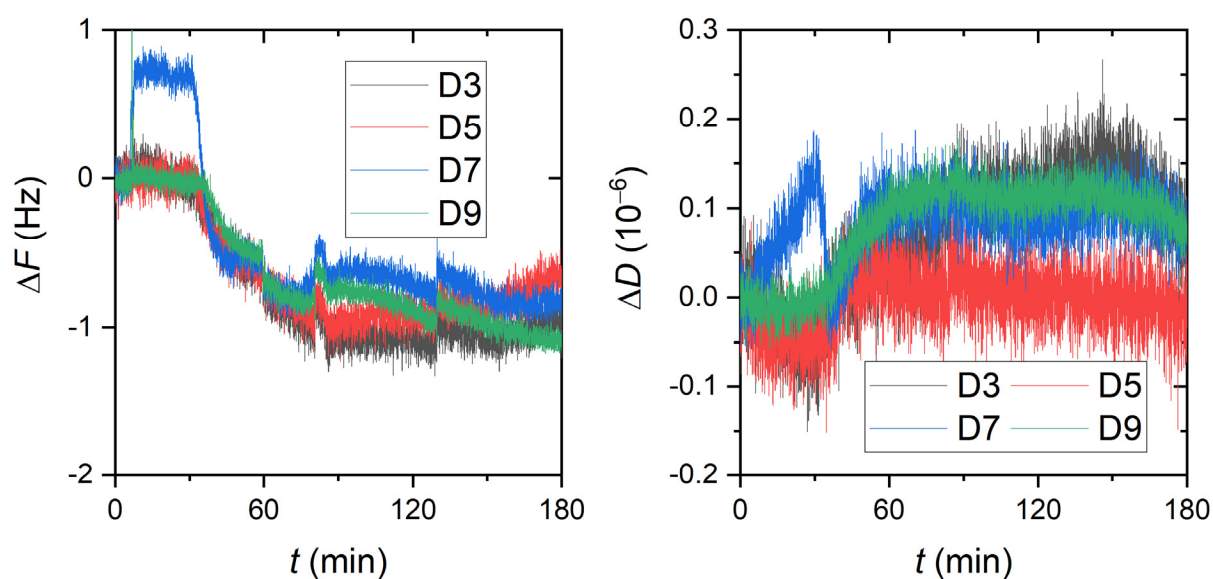

**Figure S12.** QCM-D results (overtones 3 to 9) for PAO(128-144) adsorption at the TiO<sub>x</sub>/Ti surface.
